# Supplementary material for: Aequorin as a Useful Calcium-Sensing Reporter in Candida albicans
Source: MDPI journal article supplement (doi:10.3390/jof7040319), 2021-04-20
Supplement: s1 [file s1]

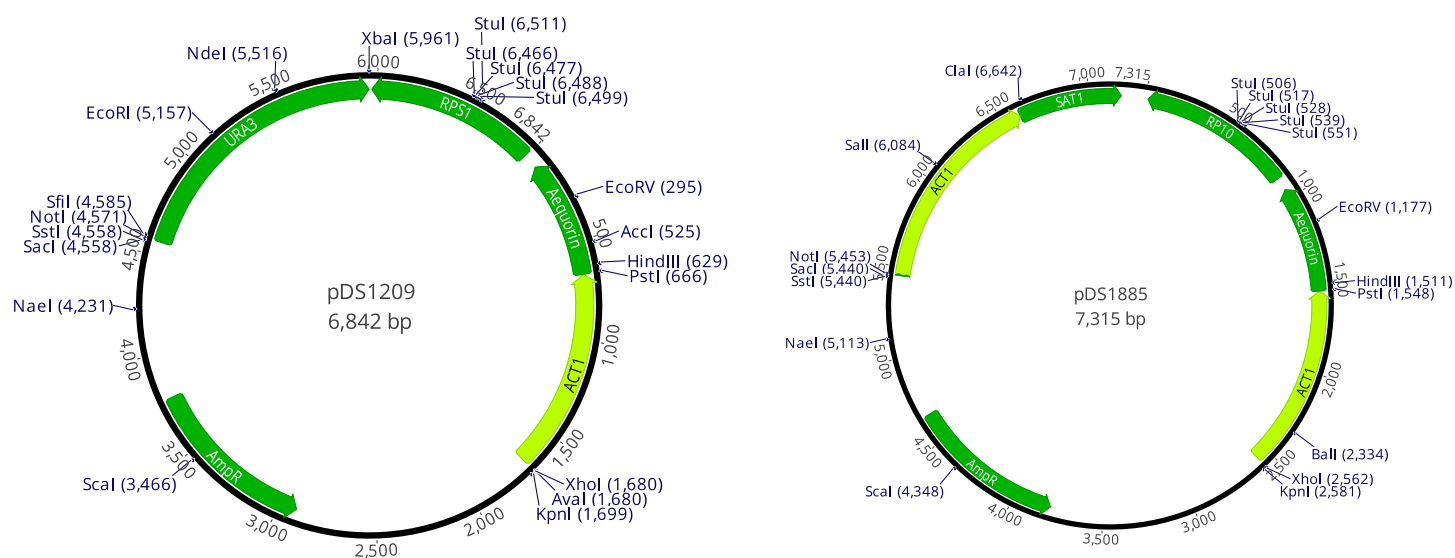

**Figure S1:** Plasmid map of aequorin expression vectors. Maps were obtained with the Geneious Prime software.

**Table S1:** Strains used in this study

| Isolate | Parent  | Genotype                                                                 | Reference  |
|---------|---------|--------------------------------------------------------------------------|------------|
| SC5314  | -       | wild-type                                                                | [46]       |
| CAF2-1  | SC5314  | <i>ura3Δ::imm434/URA3</i>                                                | [46]       |
| CAF4-2  | CAF2-1  | <i>ura3Δ::imm434/ura3Δ::imm434</i>                                       | [46]       |
| DSY3892 | CAF4-2  | <i>RPS1::pDS1209</i>                                                     | this study |
| DSY3999 | CAF4-2  | <i>VCX1/vcx1Δ::hisG-URA3-hisG</i>                                        | this study |
| DSY4026 | DSY3999 | <i>VCX1/vcx1Δ::hisG</i>                                                  | this study |
| DSY4034 | DSY4026 | <i>vcx1Δ::hisG-URA3-hisG/<br/>vcx1Δ::hisG</i>                            | this study |
| DSY4058 | DSY4034 | <i>vcx1Δ::hisG/vcx1Δ::hisG</i>                                           | this study |
| DSY4063 | DSY4058 | <i>vcx1Δ::hisG/vcx1Δ::hisG<br/>RPS1::pDS1209</i>                         | this study |
| JLR248  | SC5314  | <i>mid1Δ::FRT/mid1Δ::FRT</i>                                             | [24]       |
| JLR48   | SC5314  | <i>cch1Δ::FRT/cch1Δ::FRT</i>                                             | [24]       |
| JLR521  | SC5314  | <i>mid1Δ::FRT/mid1Δ::FRT<br/>cch1Δ::FRT/cch1Δ::FRT</i>                   | [24]       |
| DSY4726 | JLR248  | <i>mid1Δ::FRT/mid1Δ::FRT<br/>RPS1::pDS1885</i>                           | this study |
| DSY4727 | JLR48   | <i>cch1Δ::FRT/cch1Δ::FRT<br/>RPS1::pDS1885</i>                           | this study |
| DSY4729 | JLR521  | <i>mid1Δ::FRT/mid1Δ::FRT<br/>cch1Δ::FRT/cch1Δ::FRT<br/>RPS1::pDS1885</i> | this study |
| DSY4730 | SC5314  | <i>RPS1::pDS1885</i>                                                     | This study |

**Table S2:** List of primers used in this study

| Primer name | Primer sequence               |
|-------------|-------------------------------|
| VCX-Kpn     | TTCCCTGGTACCAAGGATAAACTAAGAAT |
| VCX-BgB     | TGGTAGATCTCTATTCTCTGTTGTTTG   |

|           |                                             |
|-----------|---------------------------------------------|
| VCX-PstB  | ATAGATCTGCAGAAAGATCAAGCAAAGTTG              |
| VCX-HindB | TAAAAGCTTTTGGTTTCCTAGTCAAAAACAG             |
| AOQ-NHE   | GCGCAAAGCTAGCTTAGGGGACAGCTCCACCGTAGAGCTTT   |
| AOQ-PST   | GCGCAACTGCAGAAAATGACAAGCAAACAATACTCAGTCAAGC |
| AOQ-5     | GAGCCATTACATTGGATGAATGGAAAGCATACACCA        |
| AOQ-3     | CATTCATCCAATGTAATGGCTCCATTTTGATCTTTGTC      |
| AOQ2-5    | GAAGGATGGAAAAGATTGGCTTCCGAGGAATTGAAAAG      |
| AOQ2-3    | CTTTTCAATTCCTCGGAAGCCAATCTTTTCCATCCTTC      |
